## Sox5 and Th17 cell differentiation

Akira Suto, Shigeru Tanaka and Hiroshi Nakajima

Sox (SRY-related high-mobility-group (HMG)-box) transcription factors, which are comprised of 20 genes containing a conserved HMG DNA-binding domain, are divided into 8 groups (from A to H) according to structural homologies [reviewed in 1-2]. SoxC group, which is composed of Sox4, Sox11, and Sox12, has a HMG box domain and a transactivation domain and plays important roles in the development of heart, nerve system, kidney, and pancreas. SoxD group, which is composed of Sox5, Sox6, and Sox13, has a HMG box domain in C-terminal half and group-specific coiled-coil domain(s) in N-terminal half. SoxD proteins interact with each other through their coiled-coil domain and their activity is likely to be influenced by other molecules with which they interact. Sox5 and Sox6 are paralogous genes highly expressed in spermatids, neurons, oligodendrocytes, and chondrocytes, and are indispensable for chondrogenesis.

Regarding the roles of Sox family genes in T cell immunity, it has been demonstrated that Sox4 suppresses GATA3 function and thereby inhibits Th2 cell-mediated inflammation [reviewed in 3]. On the other hand, Sox13 plays a critical role in the development of  $\gamma\delta$  T cell receptor<sup>+</sup> thymocytes and Sox13, together with Sox4, induces the differentiation of IL-17-producing  $\gamma\delta$  T cells (T $\gamma\delta$ 17 cells) through the induction of orphan nuclear receptor ROR $\gamma$ t [3]. Sox4 is also expressed in  $\alpha\beta$  T cells;

however, Sox4 is not essential for the differentiation of IL-17-producing  $\alpha\beta$  T cells (Th17 cells) [3], which are involved not only in the host defense against extracellular pathogens but also in the pathogenesis of autoimmune diseases [4]. Because ROR $\gamma$ t, which is encoded by *Rorc* gene, plays a central role in the differentiation of Th17 cells as well as T $\gamma\delta$ 17 cells [4], it is suggested that the involvement of Sox transcription factors in ROR $\gamma$ t induction seems different between Th17 cells and T $\gamma\delta$ 17 cells.

It is well established that IL-6- and/or IL-21-mediated Stat3 activation is indispensable for the induction of ROR $\gamma$ t during Th17 cell differentiation. Stat3 binds to intron 1 of *Rorc* gene and induces chromatin remodeling of the locus. In addition, Stat3 activation results in the induction of many genes implicated in Th17 cell differentiation such as Nfkbiz, Rora, Batf, Irf4, Ahr, Maf, and HIF-1 $\alpha$  (Figure 1) [4]. Among these genes, HIF-1 has been shown to activate *Rorc* promoter. However, the downstream targets of Stat3 for ROR $\gamma$ t induction in Th17 cells have not been fully understood. To identify the downstream pathway of IL-6-Stat3 signaling for Th17 cell differentiation, we have performed DNA microarray analysis of IL-6-stimulated CD4<sup>+</sup> T cells. We found that c-Maf and a novel isoform of Sox5 (named Sox5t) were highly induced in IL-6-stimulated CD4<sup>+</sup> T cells and that

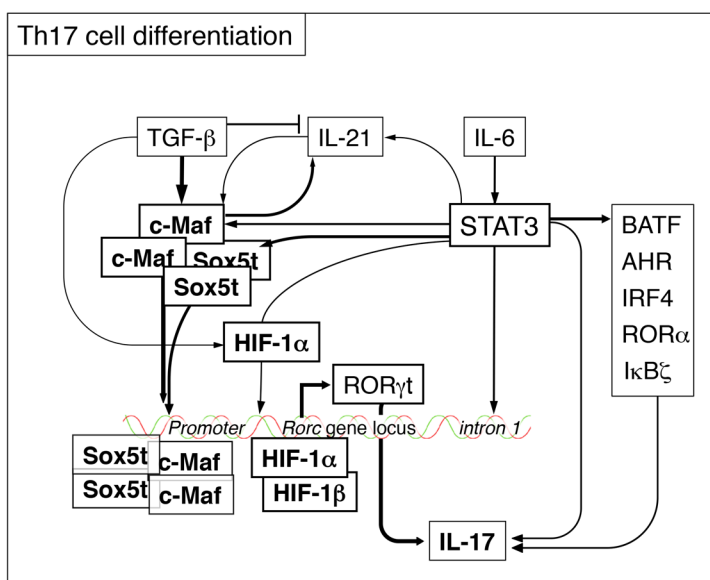

Figure 1: A schematic model for the role of Sox5t and c-Maf in Th17 cell differentiation

Stat3 was indispensable for the induction of c-Maf and Sox5t [5]. We also found that severity of Th17 cell-mediated immune responses, such as experimental autoimmune encephalomyelitis and delayed-type hypersensitivity, were reduced in T cell-specific Sox5-deficient mice [5]. Moreover, Th17 cell differentiation was impaired in T cell-specific Sox5-deficient mice both in vivo and in vitro, indicating that Sox5t is involved in Th17 cell differentiation.

To address the mechanism underlying Sox5t-mediated Th17 cell differentiation, we examined the effect of retrovirus-mediated Sox5t induction on Th17 cell differentiation. Intriguingly, although the enforced expression of Sox5t itself did not induce IL-17 production in CD4<sup>+</sup> T cells, the expression of Sox5t together with c-Maf significantly induced IL-17 production even under neutral conditions [5]. Co-induction of Sox5t and c-Maf induced IL-17 production in Stat3-deficient CD4<sup>+</sup> T cells but not in ROR $\gamma$ t-deficient CD4<sup>+</sup> T cells, suggesting that Sox5t and c-Maf induce Th17 cell differentiation as downstream effectors of Stat3 and as upstream inducers of ROR $\gamma$ t. We further demonstrated that ROR $\gamma$ t was one of the direct targets of Sox5t and c-Maf by integrating the data of RNA-seq analyses and ChIP-seq analyses of Sox5t- and c-Maf-expressed CD4<sup>+</sup> T cells. Moreover, we confirmed that Sox5t and c-Maf activated ROR $\gamma$ t promoter in primary CD4<sup>+</sup> T cells. Analyses using deletion mutants of Sox5t and c-Maf revealed that Sox5t was associated with c-Maf via HMG domain of Sox5t and DNA-binding domain of c-Maf.

Our study has demonstrated that Sox5t is expressed in Th17 cells and together with c-Maf, induces ROR $\gamma$ t expression during Th17 cell differentiation (Figure

1). With regard to the relationship between Sox5 and autoimmune diseases in humans, it has been shown that Sox5 is one of the most strikingly upregulated transcription factors in whole blood in patients with multiple sclerosis [6]. In addition, a genome-wide association study (GWAS) has revealed that Sox5 is associated with limited systemic sclerosis [7]. Taken together, these results suggest the involvement of Sox5 expressed in CD4<sup>+</sup> T cells in the pathogenesis of autoimmune diseases through the induction of Th17 cell differentiation.

**Hiroshi Nakajima:** Department of Allergy and Clinical Immunology, Graduate School of Medicine, Chiba University, Chiba, Japan

**Correspondence to:** Hiroshi Nakajima, **email** nakajimh@faculty.chiba-u.jp

**Keywords:** Immunology and Microbiology Section, Immune response, Immunity

**Received:** June 24, 2015

**Published:** July 03, 2015

## REFERENCES

1. Lefebvre V, et al. *Int J Biochem Cell Biol.* 2007; 39: 2195-214.
2. Wegner M. *Int J Biochem Cell Biol.* 2010; 42: 381-90.
3. Kang J, et al. *Annu Rev Immunol.* 2015; 33: 505-38.
4. Ghoreschi K, et al. *Trends Immunol.* 2011; 32: 395-401.
5. Tanaka S, et al. *J Exp Med.* 2014; 211: 1857-74.
6. Riveros C, et al., *PLoS One.* 2010; 5: e14176.
7. Gorlova O, et al., *PLoS Genet.* 2011; 7: e1002178.
